# Supplementary material
Source: PubMed Central journal article supplement (PMC11028164)
Supplement: 262_2017_2069_MOESM1_ESM.pdf [file 262_2017_2069_MOESM1_ESM.pdf]

**Supplementary Figure 1.** This flow-diagram illustrates the process of patient selection.

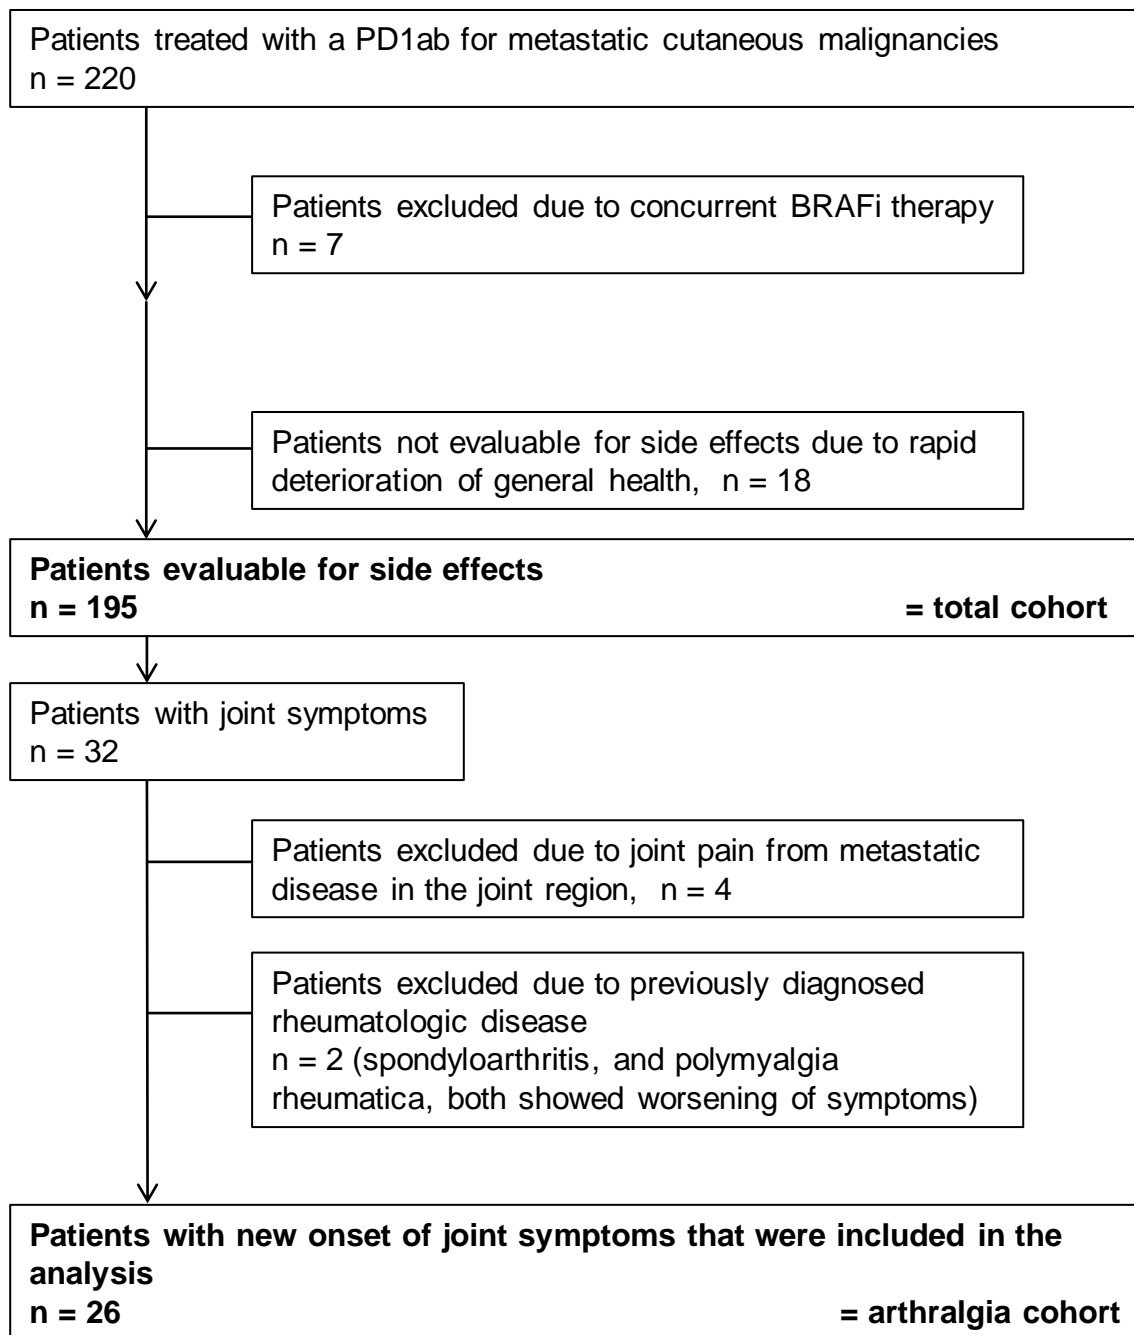

Abbreviations: PD1ab – PD-1 antibody, BRAFi – BRAF inhibitor
